# Supplementary material for: Psychological burden associated with incident persistent symptoms and their evolution during the COVID-19 pandemic: a prospective population-based study
Source: HighWire-hosted journal article supplement (doi:10.1136/bmjment-2023-300907), 2024-01-01
Supplement: bmjment-2023-300907supp001_data_supplement.pdf [file bmjment-2023-300907supp001_data_supplement.pdf]

| <b>Supplementary Table 1. Proportion of missing data.</b>                                                 |                                                                    |                                                                        |
|-----------------------------------------------------------------------------------------------------------|--------------------------------------------------------------------|------------------------------------------------------------------------|
|                                                                                                           | Participants with SARS-CoV-2 infection prior to baseline (N = 770) | Participants without SARS-CoV-2 infection prior to baseline (N = 7654) |
| Gender                                                                                                    | 0.0%                                                               | 0.0%                                                                   |
| Age                                                                                                       | 0.0%                                                               | 0.0%                                                                   |
| Educational level                                                                                         | 1.3%                                                               | 1.0%                                                                   |
| Household income                                                                                          | 3.1%                                                               | 4.5%                                                                   |
| Tobacco smoking status                                                                                    | 2.9%                                                               | 3.2%                                                                   |
| Body mass index                                                                                           | 1.6%                                                               | 1.4%                                                                   |
| Self-rated health                                                                                         | 0.7%                                                               | 0.8%                                                                   |
| Infection during follow-up                                                                                | NA                                                                 | 0.0%                                                                   |
| SSD-12 total score (at least one missing item)                                                            | 22.6%                                                              | 24.2%                                                                  |
| SSD-12 item 1                                                                                             | 0.6%                                                               | 0.8%                                                                   |
| SSD-12 item 2                                                                                             | 0.8%                                                               | 0.8%                                                                   |
| SSD-12 item 3                                                                                             | 0.7%                                                               | 0.7%                                                                   |
| SSD-12 item 4                                                                                             | 0.8%                                                               | 1.1%                                                                   |
| SSD-12 item 5                                                                                             | 0.7%                                                               | 0.8%                                                                   |
| SSD-12 item 6                                                                                             | 0.8%                                                               | 1.1%                                                                   |
| SSD-12 item 7                                                                                             | 19.8%                                                              | 20.9%                                                                  |
| SSD-12 item 8                                                                                             | 1.6%                                                               | 2.5%                                                                   |
| SSD-12 item 9                                                                                             | 1.1%                                                               | 1.3%                                                                   |
| SSD-12 item 10                                                                                            | 4.6%                                                               | 4.9%                                                                   |
| SSD-12 item 11                                                                                            | 1.8%                                                               | 2.4%                                                                   |
| SSD-12 item 12                                                                                            | 1.1%                                                               | 1.6%                                                                   |
| Legends:<br>Abbreviations: NA: not applicable; SSD-12: 12-item Somatic Symptoms Disorder-B Criteria Scale |                                                                    |                                                                        |
